# Supplementary material
Source: HighWire-hosted journal article supplement (https://bmjopen.bmj.com/content/11/11/e047962)
Supplement: inline-supplementary-material-1 [file inline-supplementary-material-1.pdf]

## SUPPLEMENTAL MATERIAL

### Permanent pacemaker implantation after On-X aortic valve replacement: SWEDEHEART observational cohort study

Magnus Dalén, MD, PhD,<sup>1,2</sup> Michael Persson, MD,<sup>1,2</sup> Natalie Glaser, MD, PhD,<sup>2,3</sup>

Ulrik Sartipy, MD, PhD<sup>1,2</sup>

<sup>1</sup>Department of Cardiothoracic Surgery, Karolinska University Hospital, Stockholm, Sweden

<sup>2</sup>Department of Molecular Medicine and Surgery, Karolinska Institutet, Stockholm, Sweden

<sup>3</sup>Department of Cardiology, Stockholm South General Hospital, Stockholm, Sweden

## Contents

|                                                                                                                                                                                       |    |
|---------------------------------------------------------------------------------------------------------------------------------------------------------------------------------------|----|
| Supplemental Table 1. Number of patients by year of surgery. ....                                                                                                                     | 3  |
| Supplemental Table 2. Number of patients according to hospital. ....                                                                                                                  | 4  |
| Supplemental Table 3. Number of pacemaker implants by year of surgery. ....                                                                                                           | 5  |
| Supplemental Table 4. Number of pacemaker implants according to hospital. ....                                                                                                        | 6  |
| Supplemental Table 5. Baseline characteristics after IPTW. ....                                                                                                                       | 7  |
| Supplemental Table 6. Baseline characteristics after overlap weighting. ....                                                                                                          | 10 |
| Supplemental Table 7. Height, weight and body surface area. ....                                                                                                                      | 13 |
| Supplemental Figure 1. Proportion of On-X valves by year of surgery. ....                                                                                                             | 14 |
| Supplemental Figure 2. Proportion of On-X valves according to hospital. ....                                                                                                          | 15 |
| Supplemental Figure 3. Histogram of propensity scores before and after matching. ....                                                                                                 | 16 |
| Supplemental Figure 4. Absolute standardized differences before (hollow circles) and after (filled circles) propensity score matching. ....                                           | 17 |
| Supplemental Figure 5. Proportion of permanent pacemaker implants by year of surgery. ....                                                                                            | 18 |
| Supplemental Figure 6. Proportion of permanent pacemaker implants according to hospital. ....                                                                                         | 19 |
| Supplemental Figure 7. Absolute standardized differences before (hollow circles) and after (filled circles) inverse probability of treatment weighting. ....                          | 20 |
| Supplemental Figure 8. Absolute standardized differences before (hollow circles) and after (filled circles) overlap weighting. ....                                                   | 21 |
| Supplemental Figure 9. Kaplan-Meier estimated pacemaker implantation rate in the inverse probability of treatment weighted population. ....                                           | 22 |
| Supplemental Figure 10. Kaplan-Meier estimated pacemaker implantation rate in the overlap weighted population. ....                                                                   | 23 |
| Supplemental Figure 11. Crude and adjusted pacemaker implantation rate after On-X valve aortic valve replacement according to alternative approaches for confounding adjustment. .... | 24 |

**Supplemental Table 1.** Number of patients by year of surgery.

| Year of surgery | Total study population<br><i>n</i> = 2602 | On-X valve            |                       |
|-----------------|-------------------------------------------|-----------------------|-----------------------|
|                 |                                           | No<br><i>n</i> = 2021 | Yes<br><i>n</i> = 581 |
| 2005            | 251 (100%)                                | 244 (97%)             | 7 (2.8%)              |
| 2006            | 237 (100%)                                | 230 (97%)             | 7 (3.0%)              |
| 2007            | 215 (100%)                                | 187 (87%)             | 28 (13%)              |
| 2008            | 214 (100%)                                | 176 (82%)             | 38 (18%)              |
| 2009            | 152 (100%)                                | 110 (72%)             | 42 (28%)              |
| 2010            | 166 (100%)                                | 120 (72%)             | 46 (28%)              |
| 2011            | 133 (100%)                                | 100 (75%)             | 33 (25%)              |
| 2012            | 145 (100%)                                | 110 (76%)             | 35 (24%)              |
| 2013            | 157 (100%)                                | 120 (76%)             | 37 (24%)              |
| 2014            | 158 (100%)                                | 112 (71%)             | 46 (29%)              |
| 2015            | 141 (100%)                                | 100 (71%)             | 41 (29%)              |
| 2016            | 221 (100%)                                | 148 (67%)             | 73 (33%)              |
| 2017            | 193 (100%)                                | 121 (63%)             | 72 (37%)              |
| 2018            | 219 (100%)                                | 143 (65%)             | 76 (35%)              |

Numbers are n (%).

**Supplemental Table 2.** Number of patients according to hospital.

| Hospital | Total study population<br><i>n</i> = 2602 | On-X valve            |                       |
|----------|-------------------------------------------|-----------------------|-----------------------|
|          |                                           | No<br><i>n</i> = 2021 | Yes<br><i>n</i> = 581 |
| 1        | 467 (100%)                                | 413 (88%)             | 54 (12%)              |
| 2        | 340 (100%)                                | 227 (67%)             | 113 (33%)             |
| 3        | 329 (100%)                                | 304 (92%)             | 25 (7.6%)             |
| 4        | 120 (100%)                                | 120 (100%)            | 0 (0%)                |
| 5        | 398 (100%)                                | 398 (100%)            | 0 (0%)                |
| 6        | 331 (100%)                                | 243 (73%)             | 88 (27%)              |
| 7        | 221 (100%)                                | 215 (97%)             | 6 (2.7%)              |
| 8        | 396 (100%)                                | 101 (26%)             | 295 (74%)             |

Numbers are *n* (%).

**Supplemental Table 3.** Number of pacemaker implants by year of surgery.

| Year of surgery | Total study population<br><i>n</i> = 2602 | Pacemaker within 30 days |                       |
|-----------------|-------------------------------------------|--------------------------|-----------------------|
|                 |                                           | No<br><i>n</i> = 2487    | Yes<br><i>n</i> = 115 |
| 2005            | 251 (100%)                                | 243 (97%)                | 8 (3.2%)              |
| 2006            | 237 (100%)                                | 226 (95%)                | 11 (4.6%)             |
| 2007            | 215 (100%)                                | 209 (97%)                | 6 (2.8%)              |
| 2008            | 214 (100%)                                | 207 (97%)                | 7 (3.3%)              |
| 2009            | 152 (100%)                                | 144 (95%)                | 8 (5.3%)              |
| 2010            | 166 (100%)                                | 157 (95%)                | 9 (5.4%)              |
| 2011            | 133 (100%)                                | 130 (98%)                | 3 (2.3%)              |
| 2012            | 145 (100%)                                | 139 (96%)                | 6 (4.1%)              |
| 2013            | 157 (100%)                                | 151 (96%)                | 6 (3.8%)              |
| 2014            | 158 (100%)                                | 153 (97%)                | 5 (3.2%)              |
| 2015            | 141 (100%)                                | 135 (96%)                | 6 (4.3%)              |
| 2016            | 221 (100%)                                | 207 (94%)                | 14 (6.3%)             |
| 2017            | 193 (100%)                                | 182 (94%)                | 11 (5.7%)             |
| 2018            | 219 (100%)                                | 204 (93%)                | 15 (6.8%)             |

Numbers are n (%).

**Supplemental Table 4.** Number of pacemaker implants according to hospital.

| Hospital | Total study population<br><i>n</i> = 2602 | Pacemaker within 30 days |                       |
|----------|-------------------------------------------|--------------------------|-----------------------|
|          |                                           | No<br><i>n</i> = 2487    | Yes<br><i>n</i> = 115 |
| 1        | 467 (100%)                                | 442 (95%)                | 25 (5.4%)             |
| 2        | 340 (100%)                                | 316 (93%)                | 24 (7.1%)             |
| 3        | 329 (100%)                                | 311 (95%)                | 18 (5.5%)             |
| 4        | 120 (100%)                                | 115 (96%)                | 5 (4.2%)              |
| 5        | 398 (100%)                                | 389 (98%)                | 9 (2.3%)              |
| 6        | 331 (100%)                                | 319 (96%)                | 12 (3.6%)             |
| 7        | 221 (100%)                                | 213 (96%)                | 8 (3.6%)              |
| 8        | 396 (100%)                                | 382 (96%)                | 14 (3.5%)             |

Numbers are *n* (%).

**Supplemental Table 5.** Baseline characteristics after IPTW.

Baseline characteristics in patients who underwent mechanical aortic valve replacement with an On-X valve or other mechanical valves in Sweden from 2005 to 2018 before and after inverse probability of treatment weighting.

|                                         | Unweighted  |             |       | IPTW*         |               |       |
|-----------------------------------------|-------------|-------------|-------|---------------|---------------|-------|
|                                         | Control     | On-X        | SMD   | Control       | On-X          | SMD   |
| Number of patients                      | 2021        | 581         |       | 2573.7        | 2204.4        |       |
| Age (years), mean (SD)                  | 54.1 (9.0)  | 51.0 (10.7) | 0.322 | 53.5 (9.4)    | 52.8 (9.6)    | 0.067 |
| Female sex                              | 525 (26.0)  | 106 (18.2)  | 0.187 | 631.4 (24.5)  | 517.8 (23.5)  | 0.024 |
| Non-Nordic birth region                 | 207 (10.2)  | 32 (5.5)    | 0.176 | 238.7 (9.3)   | 148.1 (6.7)   | 0.094 |
| Educational level                       |             |             | 0.151 |               |               | 0.039 |
| <10 years                               | 588 (29.3)  | 132 (22.8)  |       | 716.6 (28.0)  | 579.0 (26.4)  |       |
| 10-12 years                             | 945 (47.1)  | 303 (52.2)  |       | 1230.2 (48.1) | 1091.8 (49.8) |       |
| >12 years                               | 474 (23.6)  | 145 (25.0)  |       | 611.6 (23.9)  | 520.9 (23.8)  |       |
| Disposable household income (quartiles) |             |             | 0.119 |               |               | 0.024 |
| Q1 (low)                                | 520 (25.7)  | 131 (22.5)  |       | 642.7 (25.0)  | 557.5 (25.3)  |       |
| Q2                                      | 506 (25.0)  | 145 (25.0)  |       | 648.0 (25.2)  | 547.9 (24.9)  |       |
| Q3                                      | 512 (25.3)  | 138 (23.8)  |       | 645.7 (25.1)  | 535.6 (24.3)  |       |
| Q4 (high)                               | 483 (23.9)  | 167 (28.7)  |       | 637.3 (24.8)  | 563.5 (25.6)  |       |
| Married                                 | 1065 (52.7) | 261 (44.9)  | 0.156 | 1318.3 (51.2) | 1058.1 (48.0) | 0.065 |
| Body mass index (tertiles)              |             |             | 0.012 |               |               | 0.042 |
| T1 (low)                                | 623 (33.5)  | 185 (33.0)  |       | 804.0 (33.6)  | 743.2 (35.5)  |       |

|                                          |             |            |       |               |               |       |
|------------------------------------------|-------------|------------|-------|---------------|---------------|-------|
| T2                                       | 618 (33.2)  | 189 (33.7) |       | 798.0 (33.3)  | 685.6 (32.8)  |       |
| T3 (high)                                | 620 (33.3)  | 187 (33.3) |       | 791.3 (33.1)  | 663.3 (31.7)  |       |
| Atrial fibrillation                      | 183 (9.1)   | 50 (8.6)   | 0.016 | 227.8 (8.9)   | 210.8 (9.6)   | 0.025 |
| Heart failure                            | 310 (15.3)  | 72 (12.4)  | 0.085 | 379.4 (14.7)  | 309.3 (14.0)  | 0.020 |
| Left ventricular ejection fraction (%)   |             |            | 0.079 |               |               | 0.035 |
| >50                                      | 1518 (75.1) | 435 (74.9) |       | 1935.0 (75.2) | 1679.7 (76.2) |       |
| 30-50                                    | 389 (19.2)  | 122 (21.0) |       | 499.8 (19.4)  | 422.0 (19.1)  |       |
| <30                                      | 114 (5.6)   | 24 (4.1)   |       | 138.8 (5.4)   | 102.7 (4.7)   |       |
| Chronic obstructive pulmonary disease    | 136 (6.7)   | 19 (3.3)   | 0.159 | 155.5 (6.0)   | 96.5 (4.4)    | 0.075 |
| Diabetes                                 | 301 (14.9)  | 60 (10.3)  | 0.138 | 360.6 (14.0)  | 254.6 (11.5)  | 0.074 |
| eGFR (ml/min/1.73 m <sup>2</sup> )       |             |            | 0.154 |               |               | 0.050 |
| >60                                      | 1865 (93.6) | 554 (96.9) |       | 2392.7 (94.3) | 2066.5 (95.0) |       |
| 45-59                                    | 85 (4.3)    | 12 (2.1)   |       | 97.5 (3.8)    | 78.0 (3.6)    |       |
| 30-44                                    | 24 (1.2)    | 4 (0.7)    |       | 27.1 (1.1)    | 22.7 (1.0)    |       |
| <30                                      | 18 (0.9)    | 2 (0.3)    |       | 20.3 (0.8)    | 9.2 (0.4)     |       |
| Preoperative dialysis                    | 19 (1.0)    | 2 (0.4)    | 0.077 | 21.5 (0.9)    | 9.5 (0.5)     | 0.052 |
| Prior myocardial infarction              | 193 (9.5)   | 42 (7.2)   | 0.084 | 235.7 (9.2)   | 173.2 (7.9)   | 0.047 |
| Prior percutaneous coronary intervention | 102 (5.0)   | 25 (4.3)   | 0.035 | 123.8 (4.8)   | 116.7 (5.3)   | 0.022 |
| Peripheral vascular disease              | 208 (10.3)  | 97 (16.7)  | 0.188 | 297.4 (11.6)  | 294.6 (13.4)  | 0.055 |
| Hypertension                             | 703 (34.8)  | 217 (37.3) | 0.053 | 905.7 (35.2)  | 789.8 (35.8)  | 0.013 |
| Hyperlipidemia                           | 344 (17.0)  | 89 (15.3)  | 0.046 | 431.7 (16.8)  | 317.2 (14.4)  | 0.066 |
| Prior stroke                             | 105 (5.2)   | 31 (5.3)   | 0.006 | 139.3 (5.4)   | 119.6 (5.4)   | 0.001 |



|                                 |            |            |       |               |              |       |
|---------------------------------|------------|------------|-------|---------------|--------------|-------|
| History of cancer               | 98 (4.8)   | 30 (5.2)   | 0.014 | 126.0 (4.9)   | 116.2 (5.3)  | 0.017 |
| Alcohol dependence              | 69 (3.4)   | 15 (2.6)   | 0.049 | 84.6 (3.3)    | 50.8 (2.3)   | 0.059 |
| Liver disease                   | 18 (0.9)   | 3 (0.5)    | 0.045 | 20.9 (0.8)    | 9.5 (0.4)    | 0.049 |
| Prior bleeding event            | 67 (3.3)   | 15 (2.6)   | 0.043 | 81.4 (3.2)    | 72.6 (3.3)   | 0.008 |
| Prior endocarditis              | 92 (4.6)   | 26 (4.5)   | 0.004 | 118.3 (4.6)   | 116.2 (5.3)  | 0.031 |
| Emergent operation              | 32 (1.6)   | 11 (1.9)   | 0.024 | 41.5 (1.6)    | 36.9 (1.7)   | 0.005 |
| Coronary artery bypass grafting | 363 (18.0) | 79 (13.6)  | 0.120 | 438.9 (17.1)  | 296.2 (13.4) | 0.101 |
| Valve size (mm)                 |            |            | 0.254 |               |              | 0.075 |
| 19-21                           | 450 (22.7) | 149 (25.8) |       | 589.5 (23.2)  | 548.5 (25.3) |       |
| 23                              | 704 (35.4) | 256 (44.3) |       | 944.9 (37.3)  | 841.0 (38.8) |       |
| 25-27                           | 832 (41.9) | 173 (29.9) |       | 1001.4 (39.5) | 780.5 (36.0) |       |

Numbers are n (%) unless otherwise specified.

eGFR = estimated glomerular filtration rate, SD = standard deviation, SMD = standardized mean difference

\* The overall numbers of patients in each group are not necessarily integers owing to inverse probability of treatment weighting.

**Supplemental Table 6.** Baseline characteristics after overlap weighting.

Baseline characteristics in patients who underwent mechanical aortic valve replacement with an On-X valve or other mechanical valves in Sweden from 2005 to 2018 before and after overlap weighting.

|                                         | Unweighted   |               |       | Overlap weighting |             |        |
|-----------------------------------------|--------------|---------------|-------|-------------------|-------------|--------|
|                                         | Control      | On-X          | SMD   | Control           | On-X        | SMD    |
| Number of patients                      | 2021         | 581           |       | 407               | 407         |        |
| Age (years), mean (SD)                  | 54.15 (9.01) | 50.97 (10.70) | 0.322 | 51.8 (10.3)       | 51.8 (10.2) | <0.001 |
| Female sex                              | 525 (26.0)   | 106 (18.2)    | 0.187 | 83 (20.4)         | 83 (20.4)   | <0.001 |
| Non-Nordic birth region                 | 207 (10.2)   | 32 (5.5)      | 0.176 | 25 (6.2)          | 25 (6.2)    | <0.001 |
| Educational level                       |              |               | 0.147 |                   |             | <0.001 |
| <10 years                               | 588 (29.1)   | 132 (22.7)    |       | 97 (23.8)         | 97 (23.8)   |        |
| 10-12 years                             | 959 (47.5)   | 304 (52.3)    |       | 210 (51.6)        | 210 (51.6)  |        |
| >12 years                               | 474 (23.5)   | 145 (25.0)    |       | 100 (24.6)        | 100 (24.6)  |        |
| Disposable household income (quartiles) |              |               | 0.119 |                   |             | <0.001 |
| Q1 (low)                                | 520 (25.7)   | 131 (22.5)    |       | 95 (23.4)         | 95 (23.4)   |        |
| Q2                                      | 506 (25.0)   | 145 (25.0)    |       | 102 (25.1)        | 102 (25.1)  |        |
| Q3                                      | 512 (25.3)   | 138 (23.8)    |       | 98 (24.0)         | 98 (24.0)   |        |
| Q4 (high)                               | 483 (23.9)   | 167 (28.7)    |       | 112 (27.5)        | 112 (27.5)  |        |
| Married                                 | 1065 (52.7)  | 261 (44.9)    | 0.156 | 190 (46.7)        | 190 (46.7)  | <0.001 |
| Body mass index (tertiles)              |              |               | 0.053 |                   |             | <0.001 |
| T1 (low)                                | 623 (30.8)   | 185 (31.8)    |       | 131 (32.1)        | 131 (32.1)  |        |

|                                          |             |            |       |            |             |        |
|------------------------------------------|-------------|------------|-------|------------|-------------|--------|
| T2                                       | 778 (38.5)  | 209 (36.0) |       | 149 (36.7) | 149 (36.7)  |        |
| T3 (high)                                | 620 (30.7)  | 187 (32.2) |       | 127 (31.2) | 127 (31.2)  |        |
| Atrial fibrillation                      | 183 (9.1)   | 50 (8.6)   | 0.016 | 35 (8.5)   | 35 (8.5)    | <0.001 |
| Heart failure                            | 310 (15.3)  | 72 (12.4)  | 0.085 | 52 (12.9)  | 52.4 (12.9) | <0.001 |
| Left ventricular ejection fraction (%)   |             |            | 0.079 |            |             | <0.001 |
| >50                                      | 1518 (75.1) | 435 (74.9) |       | 307 (75.4) | 307 (75.4)  |        |
| 30-50                                    | 389 (19.2)  | 122 (21.0) |       | 83 (20.3)  | 83 (20.3)   |        |
| <30                                      | 114 (5.6)   | 24 (4.1)   |       | 17 (4.3)   | 17 (4.3)    |        |
| Chronic obstructive pulmonary disease    | 136 (6.7)   | 19 (3.3)   | 0.159 | 16 (3.8)   | 16 (3.8)    | <0.001 |
| Diabetes                                 | 301 (14.9)  | 60 (10.3)  | 0.138 | 45 (11.0)  | 45 (11.0)   | <0.001 |
| eGFR (ml/min/1.73 m <sup>2</sup> )       |             |            | 0.153 |            |             | <0.001 |
| >60                                      | 1894 (93.7) | 563 (96.9) |       | 392 (96.4) | 392 (96.4)  |        |
| 45-59                                    | 85 (4.2)    | 12 (2.1)   |       | 10 (2.4)   | 10 (2.4)    |        |
| 30-44                                    | 24 (1.2)    | 4 (0.7)    |       | 3 (0.8)    | 3 (0.8)     |        |
| <30                                      | 18 (0.9)    | 2 (0.3)    |       | 2 (0.4)    | 2 (0.4)     |        |
| Preoperative dialysis                    | 19 (0.9)    | 2 (0.3)    | 0.075 | 2 (0.4)    | 2 (0.4)     | <0.001 |
| Prior myocardial infarction              | 193 (9.5)   | 42 (7.2)   | 0.084 | 32 (7.9)   | 32 (7.9)    | <0.001 |
| Prior percutaneous coronary intervention | 102 (5.0)   | 25 (4.3)   | 0.035 | 19 (4.6)   | 19 (4.6)    | <0.001 |
| Peripheral vascular disease              | 208 (10.3)  | 97 (16.7)  | 0.188 | 60 (14.7)  | 60 (14.7)   | <0.001 |
| Hypertension                             | 703 (34.8)  | 217 (37.3) | 0.053 | 149 (36.6) | 149 (36.6)  | <0.001 |
| Hyperlipidemia                           | 344 (17.0)  | 89 (15.3)  | 0.046 | 63 (15.6)  | 63 (15.6)   | <0.001 |
| Prior stroke                             | 105 (5.2)   | 31 (5.3)   | 0.006 | 22 (5.4)   | 22 (5.4)    | <0.001 |

|                                 |            |            |       |            |            |        |
|---------------------------------|------------|------------|-------|------------|------------|--------|
| History of cancer               | 98 (4.8)   | 30 (5.2)   | 0.014 | 22 (5.3)   | 22 (5.3)   | <0.001 |
| Alcohol dependence              | 69 (3.4)   | 15 (2.6)   | 0.049 | 11 (2.7)   | 11 (2.7)   | <0.001 |
| Liver disease                   | 18 (0.9)   | 3 (0.5)    | 0.045 | 2 (0.6)    | 2 (0.6)    | <0.001 |
| Prior bleeding event            | 67 (3.3)   | 15 (2.6)   | 0.043 | 11 (2.7)   | 11 (2.7)   | <0.001 |
| Prior endocarditis              | 92 (4.6)   | 26 (4.5)   | 0.004 | 18 (4.4)   | 18 (4.4)   | <0.001 |
| Emergent operation              | 32 (1.6)   | 11 (1.9)   | 0.024 | 7 (1.7)    | 7 (1.7)    | <0.001 |
| Coronary artery bypass grafting | 363 (18.0) | 79 (13.6)  | 0.120 | 59 (14.5)  | 59 (14.5)  | <0.001 |
| Valve size (mm)                 |            |            | 0.390 |            |            | <0.001 |
| 19                              | 74 (3.7)   | 32 (5.5)   |       | 21 (5.2)   | 21 (5.2)   |        |
| 21                              | 376 (18.6) | 117 (20.1) |       | 83 (20.4)  | 83 (20.4)  |        |
| 23                              | 739 (36.6) | 259 (44.6) |       | 176 (43.2) | 176 (43.2) |        |
| 25                              | 584 (28.9) | 157 (27.0) |       | 113 (27.7) | 113 (27.7) |        |
| 27                              | 248 (12.3) | 16 (2.8)   |       | 14 (3.5)   | 14 (3.5)   |        |

Numbers are n (%) unless otherwise specified.

eGFR = estimated glomerular filtration rate, SD = standard deviation, SMD = standardized mean difference

---

**Supplemental Table 7.** Height, weight and body surface area.

---

|                     | Before matching |             |             | SMD   |
|---------------------|-----------------|-------------|-------------|-------|
|                     | Overall         | Control     | On-X        |       |
| Number of patients  | 2602            | 2021        | 581         |       |
| Height, cm          | 175 (9.4)       | 175 (9.5)   | 177 (8.8)   | 0.216 |
| Weight, kg          | 86.0 (17.3)     | 85.5 (17.1) | 87.5 (17.8) | 0.116 |
| BSA, m <sup>2</sup> | 2.04 (0.23)     | 2.03 (0.23) | 2.07 (0.23) | 0.154 |

---

Numbers are mean and standard deviation.

BSA = body surface area, SMD = standardized mean difference

**Supplemental Figure 1.** Proportion of On-X valves by year of surgery.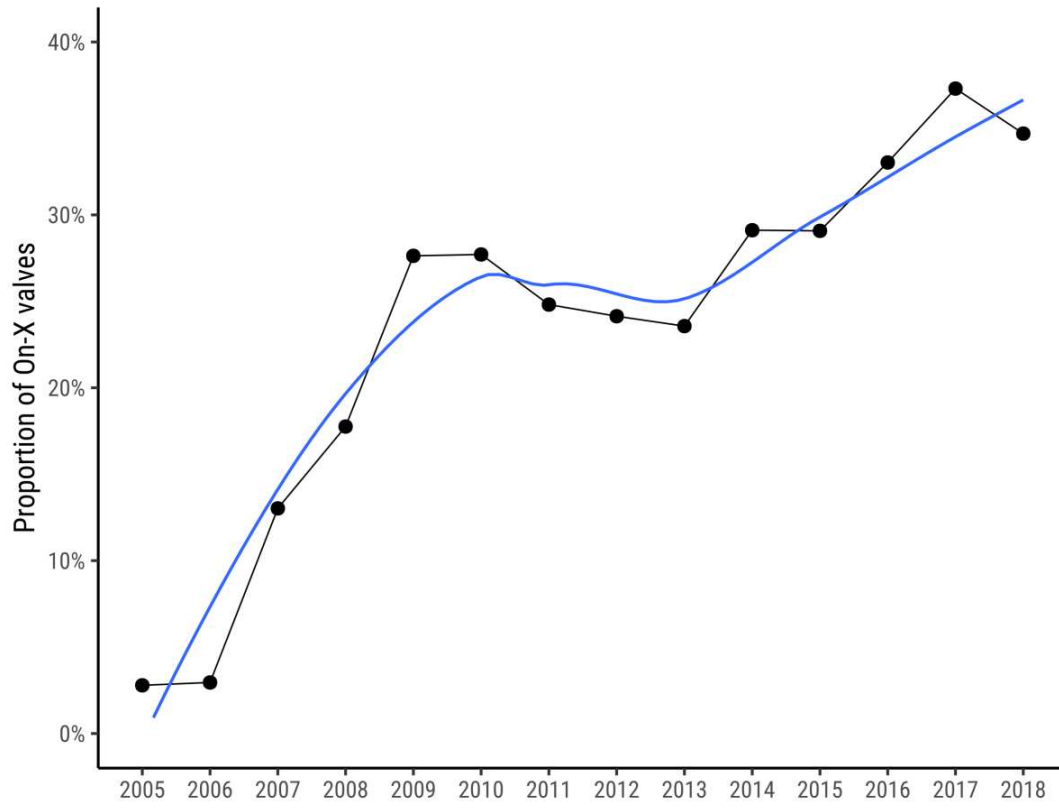

**Supplemental Figure 2.** Proportion of On-X valves according to hospital.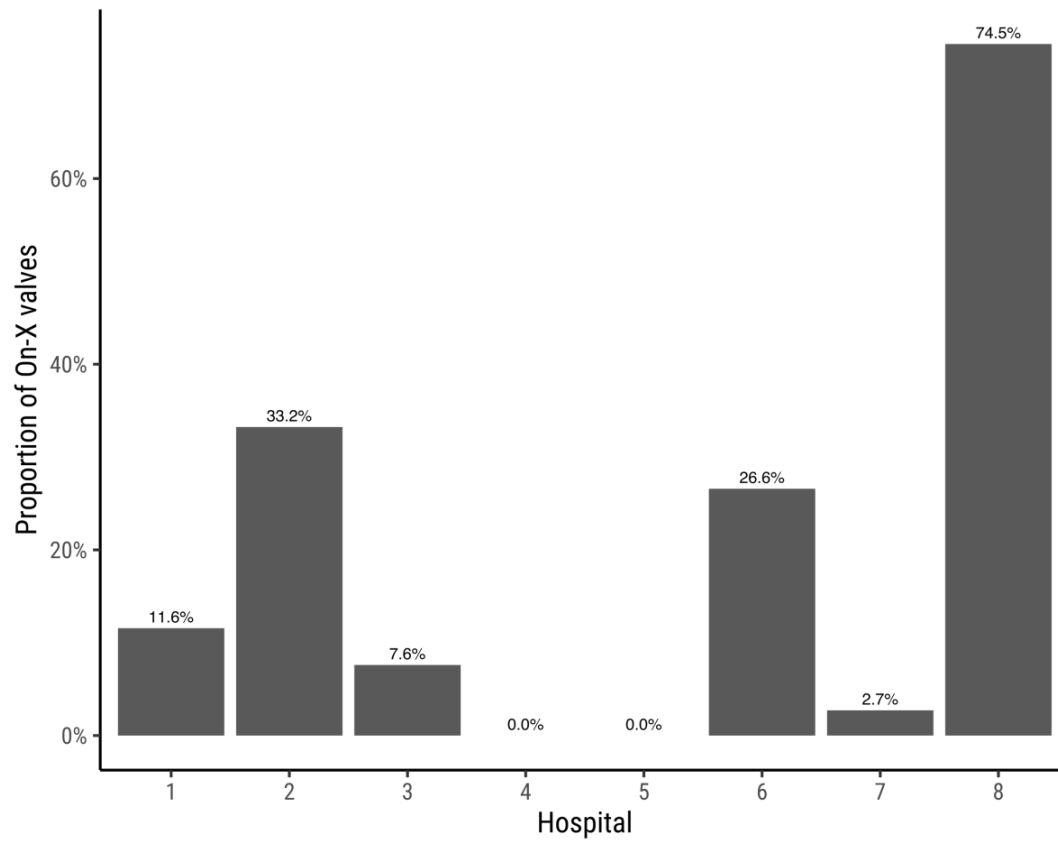

**Supplemental Figure 3.** Histogram of propensity scores before and after matching.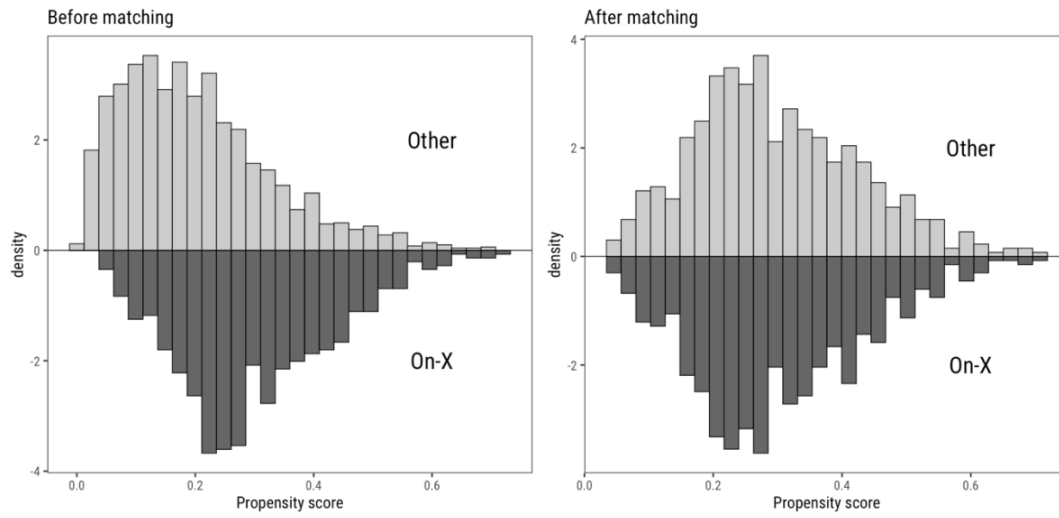



**Supplemental Figure 4.** Absolute standardized differences before (hollow circles) and after (filled circles) propensity score matching.

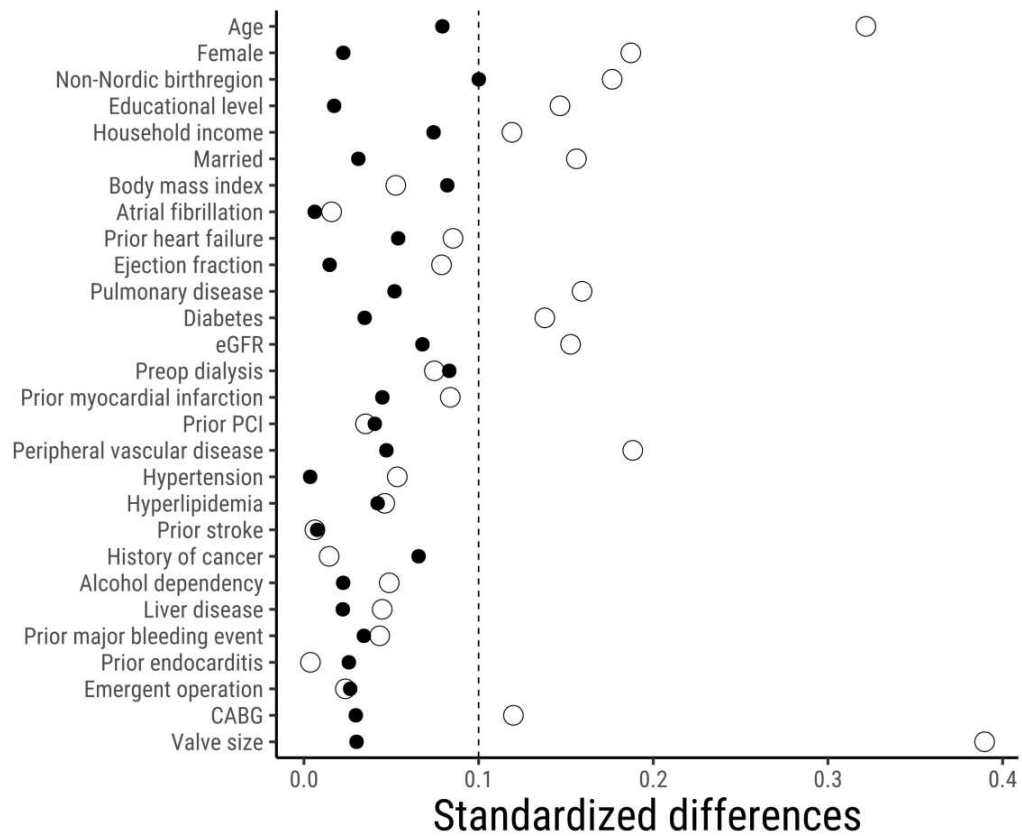

**Supplemental Figure 5.** Proportion of permanent pacemaker implants by year of surgery.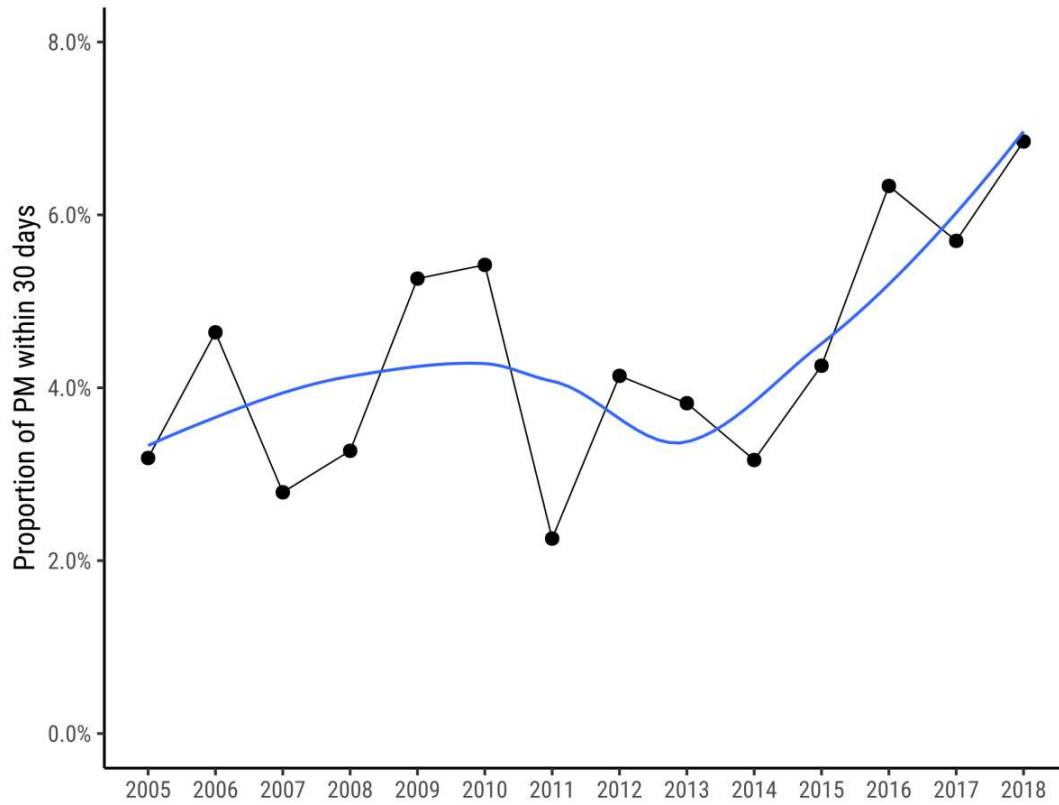

**Supplemental Figure 6.** Proportion of permanent pacemaker implants according to hospital.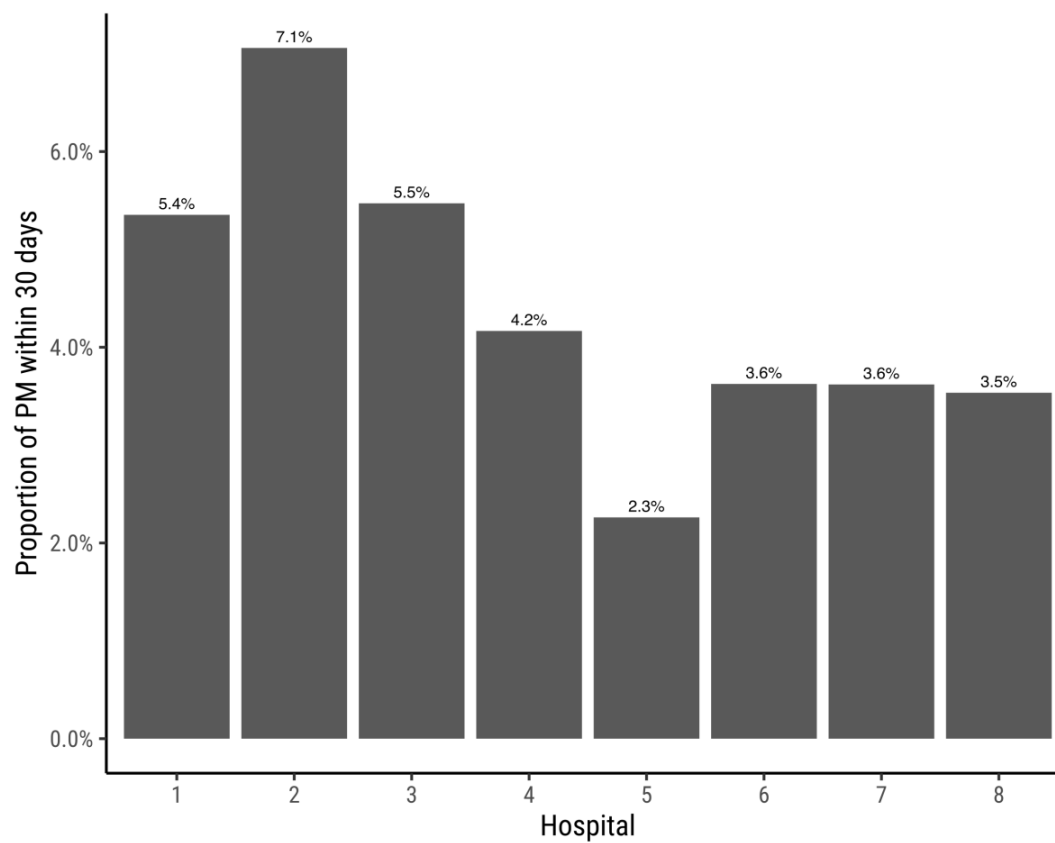

**Supplemental Figure 7.** Absolute standardized differences before (hollow circles) and after (filled circles) inverse probability of treatment weighting.

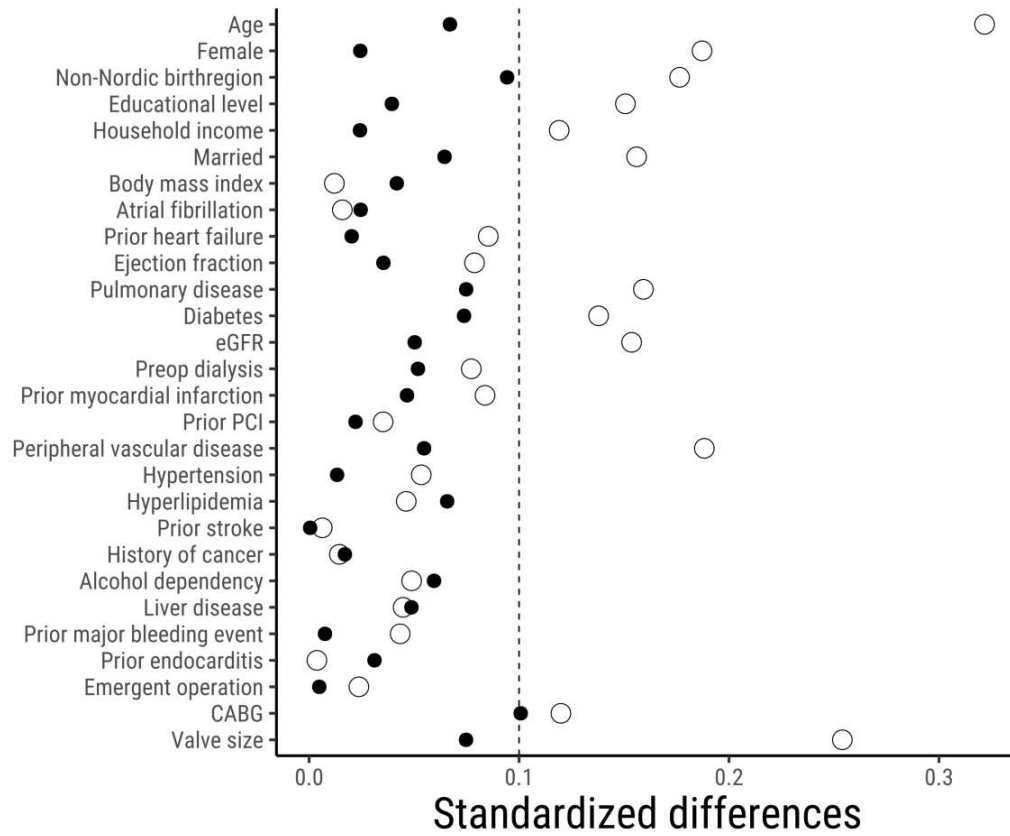

**Supplemental Figure 8.** Absolute standardized differences before (hollow circles) and after (filled circles) overlap weighting.

*Note:* This method yields exact covariate balance between treated and reference groups by construction.

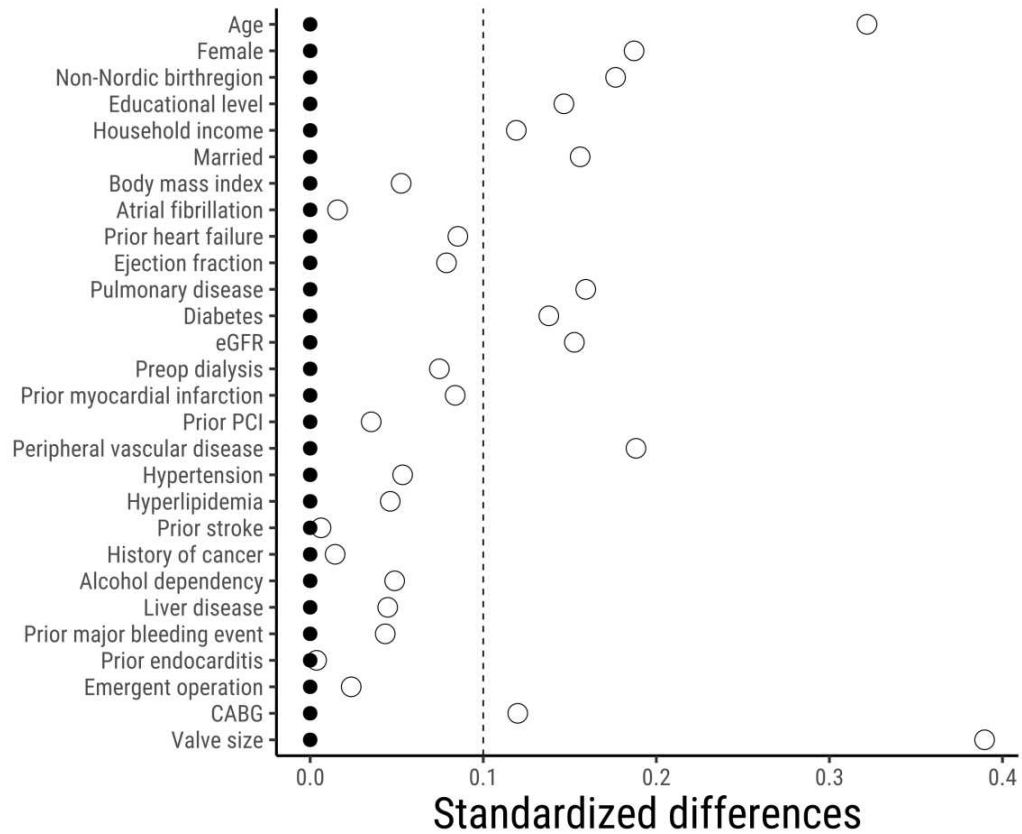

**Supplemental Figure 9.** Kaplan-Meier estimated pacemaker implantation rate in the inverse probability of treatment weighted population.

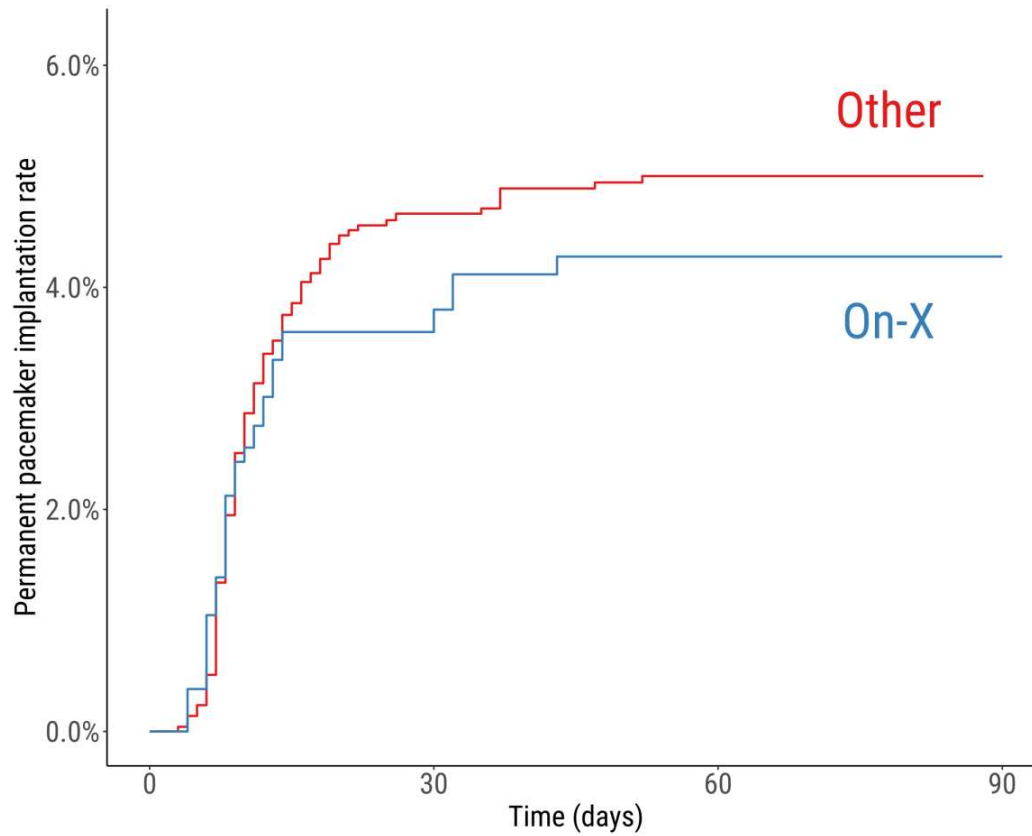

**Supplemental Figure 10.** Kaplan-Meier estimated pacemaker implantation rate in the overlap weighted population.

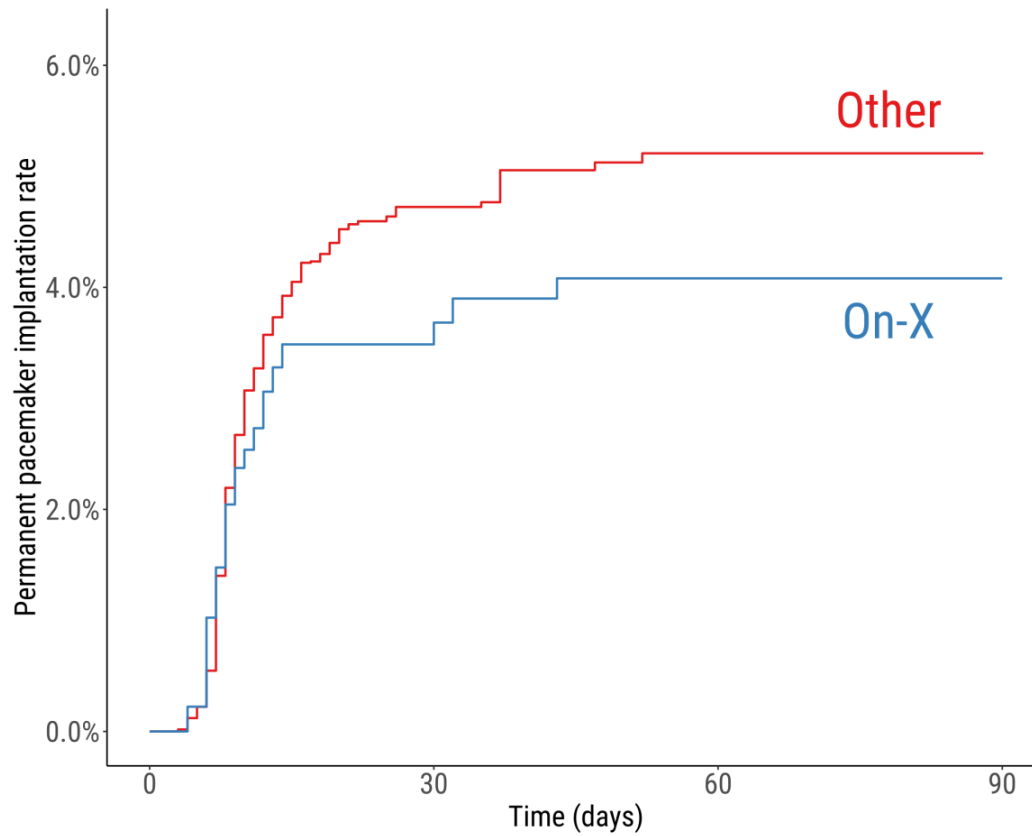

**Supplemental Figure 11.** Crude and adjusted pacemaker implantation rate after On-X valve aortic valve replacement according to alternative approaches for confounding adjustment.

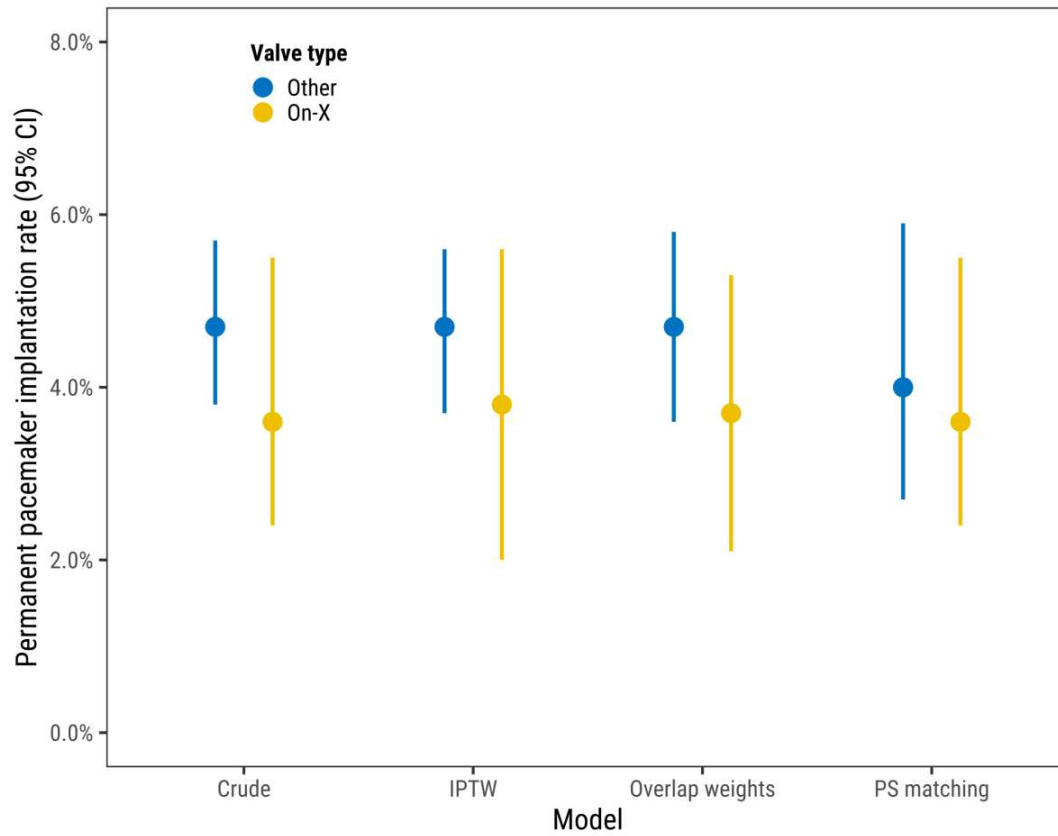

Note: IPTW = inverse probability of treatment weighting, PS = propensity score
